# Supplementary material for: The roles of contact conformity, temperature and displacement amplitude on the lubricated fretting wear of a steel-on-steel contact
Source: R Soc Open Sci. 2016 Oct 19;3(10):150637. doi: 10.1098/rsos.150637 (PMC5095370; doi:10.1098/rsos.150637)
Supplement: Fig-13b [file rsos150637supp6.xlsx]

## Sheet: Fig-16b
Figure 16b
Cycles / 10^5	Tempearture / ˚C
	Amb	85	150	230
	COF
0	0.116482	0.161506	0.125213	0.186058
0.001	0.144203	0.152319	0.184873	0.214807
0.002	0.140511	0.139686	0.175354	0.200681
0.003	0.138532	0.140499	0.1771	0.198013
0.004	0.136716	0.141063	0.177989	0.197329
0.005	0.135346	0.141817	0.178062	0.195916
0.006	0.134403	0.143141	0.176584	0.194791
0.007	0.133805	0.144527	0.176552	0.194679
0.008	0.133567	0.145337	0.176515	0.194969
0.009	0.133361	0.145979	0.176554	0.194566
0.01	0.133313	0.146398	0.176044	0.194342
0.011	0.133437	0.146532	0.176097	0.194346
0.012	0.133422	0.148261	0.175762	0.193485
0.013	0.133575	0.146704	0.176661	0.192898
0.014	0.133654	0.146209	0.177015	0.192648
0.015	0.133743	0.146349	0.177268	0.1923
0.016	0.133834	0.14606	0.177947	0.191272
0.017	0.133927	0.145362	0.177848	0.186129
0.018	0.133888	0.145196	0.17722	0.184353
0.019	0.134071	0.145692	0.177788	0.185508
0.02	0.134129	0.146193	0.177234	0.186798
0.021	0.134109	0.145564	0.177427	0.189191
0.022	0.134315	0.145491	0.177803	0.188952
0.023	0.134499	0.146347	0.178867	0.188624
0.024	0.13443	0.146512	0.178849	0.188379
0.025	0.134681	0.146177	0.178385	0.188034
0.026	0.134766	0.146031	0.179658	0.186252
0.027	0.135058	0.145721	0.180491	0.181484
0.028	0.135084	0.145444	0.181073	0.181
0.029	0.135293	0.145247	0.181027	0.18152
0.03	0.135473	0.145478	0.182486	0.185169
0.031	0.135749	0.144822	0.182793	0.186894
0.032	0.135876	0.146129	0.182781	0.18889
0.033	0.136117	0.145465	0.184131	0.192244
0.034	0.136311	0.14398	0.184195	0.195275
0.035	0.136559	0.144171	0.185636	0.195592
0.036	0.136838	0.144542	0.187417	0.197741
0.037	0.137255	0.144123	0.187831	0.199145
0.038	0.13768	0.14435	0.188591	0.193153
0.039	0.138101	0.144907	0.189771	0.185642
0.04	0.138413	0.145239	0.19166	0.186923
0.041	0.138704	0.144721	0.192689	0.190902
0.042	0.139091	0.144869	0.193174	0.193805
0.043	0.139423	0.144598	0.192922	0.196542
0.044	0.139832	0.143959	0.193872	0.197848
0.045	0.140382	0.144528	0.193908	0.199083
0.046	0.140832	0.144341	0.194032	0.200502
0.047	0.141194	0.144352	0.194814	0.201238
0.048	0.14169	0.144491	0.19639	0.201854
0.049	0.142088	0.144119	0.196101	0.202626
0.05	0.14251	0.143819	0.196324	0.203703
0.051	0.143157	0.14361	0.19696	0.20358
0.052	0.14359	0.143248	0.197347	0.203224
0.053	0.143951	0.143447	0.198467	0.201495
0.054	0.144201	0.143351	0.199162	0.19941
0.055	0.14465	0.143835	0.199408	0.197177
0.056	0.145037	0.144425	0.198595	0.195593
0.057	0.14566	0.144939	0.200845	0.193382
0.058	0.145931	0.144613	0.201968	0.192125
0.059	0.146363	0.145073	0.202041	0.195451
0.06	0.146849	0.14486	0.202429	0.197112
0.061	0.147079	0.144746	0.201831	0.198407
0.062	0.147514	0.144399	0.201374	0.200801
0.063	0.147735	0.144485	0.202277	0.201283
0.064	0.147967	0.145077	0.204526	0.201969
0.065	0.148482	0.144889	0.205478	0.202898
0.066	0.148688	0.144691	0.206531	0.204397
0.067	0.14897	0.144145	0.205547	0.204096
0.068	0.14933	0.144433	0.205936	0.20405
0.069	0.149828	0.144487	0.205595	0.205884
0.07	0.150184	0.144895	0.205387	0.20619
0.071	0.150367	0.144941	0.207582	0.206289
0.072	0.150378	0.145371	0.207739	0.206422
0.073	0.150523	0.144762	0.207456	0.206839
0.074	0.150859	0.144667	0.207565	0.207531
0.075	0.151521	0.144761	0.207313	0.20752
0.076	0.151672	0.144577	0.208002	0.206797
0.077	0.151991	0.145637	0.208512	0.20653
0.078	0.152028	0.14545	0.208743	0.207282
0.079	0.152251	0.145819	0.20873	0.207111
0.08	0.152568	0.145817	0.209919	0.207424
0.081	0.152738	0.145194	0.210872	0.207924
0.082	0.153152	0.145469	0.211271	0.20794
0.083	0.15369	0.146115	0.211603	0.207792
0.084	0.154182	0.146358	0.211672	0.20792
0.085	0.154416	0.146623	0.211446	0.20828
0.086	0.154801	0.146526	0.213192	0.207881
0.087	0.155495	0.147238	0.213311	0.207517
0.088	0.156072	0.147589	0.213824	0.208263
0.089	0.156042	0.148263	0.213593	0.207454
0.09	0.15618	0.148084	0.211588	0.20715
0.091	0.156923	0.148072	0.213242	0.206834
0.092	0.157679	0.148365	0.21384	0.205844
0.093	0.158191	0.148421	0.214741	0.205015
0.094	0.158413	0.147908	0.214798	0.204382
0.095	0.159147	0.148614	0.214578	0.20549
0.096	0.159722	0.148897	0.215677	0.203292
0.097	0.160429	0.14972	0.215475	0.203558
0.098	0.160953	0.149193	0.217053	0.203794
0.099	0.161571	0.149486	0.216433	0.202846
0.1	0.162211	0.149577	0.217775	0.202553
0.101	0.162444	0.149454	0.216868	0.202295
0.102	0.163351	0.149882	0.218036	0.201499
0.103	0.16375	0.149638	0.218695	0.200637
0.104	0.164625	0.149993	0.217862	0.199036
0.105	0.164798	0.151044	0.218075	0.198614
0.106	0.16589	0.150682	0.218192	0.198251
0.107	0.165991	0.150538	0.220017	0.197866
0.108	0.167242	0.150481	0.219946	0.19701
0.109	0.167694	0.150903	0.220552	0.197255
0.11	0.168576	0.151056	0.221255	0.196438
0.111	0.168656	0.151716	0.221131	0.195791
0.112	0.168932	0.151619	0.22145	0.195576
0.113	0.169719	0.152235	0.222509	0.196268
0.114	0.169913	0.152611	0.224497	0.195726
0.115	0.170727	0.152231	0.224789	0.193212
0.116	0.171387	0.151721	0.223772	0.194751
0.117	0.171646	0.152198	0.223389	0.194626
0.118	0.17241	0.152392	0.223906	0.195785
0.119	0.17295	0.15252	0.224984	0.195215
0.12	0.173741	0.152513	0.225531	0.196799
0.121	0.174316	0.15239	0.224961	0.196339
0.122	0.174986	0.15284	0.225955	0.197483
0.123	0.175629	0.152703	0.227112	0.197693
0.124	0.176104	0.152348	0.227739	0.198345
0.125	0.176868	0.152049	0.225933	0.198201
0.126	0.177471	0.152114	0.226199	0.199246
0.127	0.1778	0.152331	0.227005	0.200675
0.128	0.178118	0.152801	0.227252	0.201509
0.129	0.178664	0.152649	0.228655	0.203021
0.13	0.17958	0.152588	0.228927	0.203967
0.131	0.18003	0.152522	0.229173	0.20513
0.132	0.180345	0.152633	0.228517	0.205989
0.133	0.180961	0.153075	0.22978	0.206303
0.134	0.181628	0.152876	0.229162	0.206635
0.135	0.181866	0.15331	0.228369	0.207901
0.136	0.183099	0.153272	0.22948	0.208503
0.137	0.183176	0.15321	0.230046	0.20946
0.138	0.183569	0.154311	0.229353	0.210919
0.139	0.183546	0.154813	0.231121	0.211184
0.14	0.184662	0.155077	0.230851	0.212356
0.141	0.184878	0.155028	0.230773	0.21251
0.142	0.185601	0.154519	0.231471	0.213315
0.143	0.185509	0.154624	0.23041	0.213645
0.144	0.185331	0.15446	0.230426	0.213349
0.145	0.186546	0.154548	0.230568	0.21291
0.146	0.186574	0.154916	0.232573	0.212409
0.147	0.187587	0.155502	0.233094	0.213347
0.148	0.188098	0.155884	0.23285	0.213492
0.149	0.188409	0.156756	0.23217	0.213011
0.15	0.18913	0.157236	0.23387	0.212281
0.151	0.188968	0.15694	0.233929	0.21271
0.152	0.190057	0.157095	0.234203	0.211411
0.153	0.189695	0.156807	0.233626	0.210863
0.154	0.190722	0.15715	0.236226	0.210804
0.155	0.190973	0.158087	0.234911	0.207094
0.156	0.190604	0.157936	0.23486	0.204808
0.157	0.191799	0.157945	0.235564	0.203534
0.158	0.191223	0.158347	0.235795	0.199449
0.159	0.19235	0.157911	0.23621	0.195646
0.16	0.192308	0.157608	0.235335	0.195933
0.161	0.194008	0.158301	0.237244	0.195693
0.162	0.192418	0.158285	0.236603	0.1986
0.163	0.194242	0.158242	0.237815	0.199338
0.164	0.193561	0.157735	0.23801	0.201223
0.165	0.196018	0.15726	0.236692	0.201411
0.166	0.195669	0.158145	0.236021	0.200814
0.167	0.194386	0.15848	0.236474	0.204335
0.168	0.195632	0.158381	0.237408	0.208184
0.169	0.195561	0.158698	0.2378	0.20859
0.17	0.195655	0.158704	0.238293	0.210026
0.171	0.195734	0.15987	0.239589	0.210732
0.172	0.197039	0.159058	0.238993	0.211465
0.173	0.196288	0.158954	0.23929	0.212997
0.174	0.196425	0.159271	0.240179	0.213301
0.175	0.197507	0.159043	0.238477	0.212954
0.176	0.197054	0.159836	0.237706	0.212966
0.177	0.198074	0.159628	0.238229	0.213245
0.178	0.198706	0.159585	0.238213	0.214328
0.179	0.198144	0.159048	0.237911	0.215486
0.18	0.20016	0.159645	0.238879	0.215662
0.181	0.199143	0.159918	0.238479	0.217047
0.182	0.20062	0.159595	0.238869	0.216693
0.183	0.200372	0.159378	0.240383	0.216605
0.184	0.199637	0.159141	0.241315	0.218048
0.185	0.199858	0.158595	0.239732	0.217657
0.186	0.202017	0.159245	0.23864	0.217322
0.187	0.200176	0.159487	0.239103	0.217792
0.188	0.20169	0.159357	0.240047	0.217745
0.189	0.200017	0.16008	0.240987	0.217979
0.19	0.20225	0.16034	0.239633	0.218544
0.191	0.201538	0.159896	0.241458	0.21849
0.192	0.202831	0.160298	0.239569	0.218357
0.193	0.202023	0.160996	0.240548	0.218687
0.194	0.201758	0.161118	0.242304	0.218577
0.195	0.202041	0.161592	0.243028	0.219228
0.196	0.202536	0.161649	0.243041	0.2195
0.197	0.20358	0.161011	0.241874	0.219719
0.198	0.202763	0.160717	0.240442	0.220163
0.199	0.20371	0.160528	0.238847	0.220222
0.2	0.203564	0.160428	0.239147	0.21971
0.201	0.203483	0.16094	0.241005	0.219388
0.202	0.205042	0.160982	0.242759	0.218908
0.203	0.203148	0.161745	0.242017	0.218817
0.204	0.204515	0.161881	0.241768	0.219009
0.205	0.203124	0.161717	0.242871	0.218177
0.206	0.203778	0.161958	0.243444	0.217722
0.207	0.204999	0.162251	0.242514	0.216579
0.208	0.203181	0.1616	0.242473	0.216178
0.209	0.204061	0.161078	0.243301	0.215464
0.21	0.203569	0.161782	0.243444	0.214789
0.211	0.203383	0.162394	0.245297	0.214843
0.212	0.204745	0.162833	0.245329	0.214791
0.213	0.204035	0.162192	0.242796	0.215989
0.214	0.203811	0.162078	0.243212	0.215624
0.215	0.206043	0.162872	0.246287	0.217034
0.216	0.204183	0.163497	0.245253	0.216121
0.217	0.205711	0.163308	0.245057	0.215823
0.218	0.205628	0.163042	0.24447	0.215009
0.219	0.205197	0.163343	0.245109	0.214446
0.22	0.206178	0.163249	0.245217	0.215044
0.221	0.204621	0.162905	0.245576	0.213672
0.222	0.205724	0.162908	0.245942	0.208544
0.223	0.205833	0.163755	0.245499	0.200554
0.224	0.205013	0.164071	0.247784	0.200726
0.225	0.204729	0.164242	0.248444	0.202746
0.226	0.20615	0.164569	0.247436	0.205963
0.227	0.204764	0.163611	0.247769	0.205289
0.228	0.206373	0.164005	0.248616	0.204912
0.229	0.205538	0.164123	0.24619	0.206588
0.23	0.206242	0.163589	0.248436	0.208477
0.231	0.205768	0.163968	0.249728	0.207869
0.232	0.205655	0.163949	0.247414	0.206909
0.233	0.20611	0.163578	0.248153	0.208537
0.234	0.204928	0.164462	0.246238	0.208926
0.235	0.2063	0.164389	0.247377	0.210104
0.236	0.204897	0.164855	0.245922	0.208191
0.237	0.206619	0.164186	0.246359	0.210569
0.238	0.205128	0.16512	0.247675	0.20985
0.239	0.205957	0.164714	0.248839	0.209527
0.24	0.206594	0.165222	0.247115	0.210079
0.241	0.204996	0.164877	0.247186	0.210517
0.242	0.206524	0.165169	0.248507	0.211332
0.243	0.207115	0.165473	0.25013	0.211014
0.244	0.205679	0.165254	0.248402	0.212079
0.245	0.206895	0.166304	0.246491	0.212559
0.246	0.206099	0.165454	0.247608	0.212439
0.247	0.20866	0.165489	0.250056	0.212912
0.248	0.206376	0.16528	0.250223	0.213264
0.249	0.205358	0.165625	0.249388	0.212313
0.25	0.207553	0.166132	0.246575	0.212481
0.251	0.2063	0.165721	0.247656	0.212918
0.252	0.206202	0.166265	0.250661	0.213066
0.253	0.207286	0.166612	0.249505	0.213129
0.254	0.206946	0.166071	0.248402	0.213098
0.255	0.205069	0.166792	0.249627	0.212562
0.256	0.206859	0.166676	0.250646	0.212276
0.257	0.207742	0.166349	0.251731	0.211812
0.258	0.207203	0.166279	0.251155	0.211403
0.259	0.207554	0.166668	0.250644	0.211572
0.26	0.207027	0.167039	0.252202	0.210251
0.261	0.205542	0.167027	0.252781	0.211285
0.262	0.207367	0.167284	0.252861	0.210788
0.263	0.206917	0.167481	0.252535	0.210467
0.264	0.205569	0.167689	0.253625	0.210854
0.265	0.207135	0.168222	0.250975	0.20941
0.266	0.207529	0.168236	0.25255	0.208675
0.267	0.206132	0.167804	0.253334	0.208446
0.268	0.206586	0.167736	0.251236	0.20873
0.269	0.20773	0.167952	0.252508	0.208186
0.27	0.2062	0.167962	0.253443	0.208564
0.271	0.20798	0.168829	0.254399	0.208633
0.272	0.207268	0.169061	0.254198	0.208095
0.273	0.206465	0.168545	0.253486	0.207456
0.274	0.207561	0.168929	0.25368	0.209105
0.275	0.20738	0.168761	0.253066	0.209234
0.276	0.206775	0.16871	0.253125	0.209489
0.277	0.206666	0.168971	0.253547	0.210445
0.278	0.208117	0.168884	0.252987	0.211121
0.279	0.208482	0.169145	0.253389	0.211954
0.28	0.207792	0.168898	0.254092	0.211306
0.281	0.20911	0.168962	0.253761	0.211993
0.282	0.207169	0.169245	0.254061	0.211961
0.283	0.208268	0.169416	0.255353	0.21161
0.284	0.209843	0.16932	0.257107	0.21366
0.285	0.207785	0.169447	0.255828	0.213532
0.286	0.209293	0.169746	0.253832	0.213869
0.287	0.208196	0.169905	0.255071	0.21358
0.288	0.209461	0.17016	0.256187	0.21298
0.289	0.207434	0.170122	0.254348	0.213071
0.29	0.209541	0.1696	0.254824	0.213597
0.291	0.208584	0.169791	0.257692	0.21324
0.292	0.20916	0.169842	0.25794	0.213576
0.293	0.208321	0.170034	0.257338	0.214377
0.294	0.209621	0.169539	0.258231	0.214344
0.295	0.208004	0.169766	0.255418	0.215164
0.296	0.209361	0.169994	0.254311	0.215332
0.297	0.208296	0.170151	0.257561	0.215625
0.298	0.209788	0.170841	0.256504	0.215014
0.299	0.207823	0.171135	0.257266	0.214874
0.3	0.206776	0.170304	0.256972	0.214773
0.301	0.209242	0.170491	0.254883	0.215679
0.302	0.209671	0.170454	0.255493	0.213986
0.303	0.207992	0.170828	0.255391	0.212705
0.304	0.207855	0.170747	0.25752	0.213466
0.305	0.208487	0.170704	0.257275	0.214004
0.306	0.208886	0.170781	0.25628	0.213703
0.307	0.208916	0.170568	0.257585	0.215308
0.308	0.207399	0.17111	0.257459	0.215125
0.309	0.208408	0.17087	0.256994	0.216006
0.31	0.209505	0.170871	0.257567	0.214581
0.311	0.208133	0.170699	0.25577	0.214447
0.312	0.210272	0.170785	0.256576	0.214765
0.313	0.207906	0.171902	0.258367	0.214694
0.314	0.209617	0.172873	0.259733	0.214492
0.315	0.206897	0.172557	0.261237	0.215235
0.316	0.207512	0.171641	0.258821	0.215232
0.317	0.209157	0.171477	0.257257	0.215483
0.318	0.208935	0.171772	0.259189	0.214783
0.319	0.208304	0.171611	0.259118	0.214982
0.32	0.207556	0.171583	0.259064	0.216016
0.321	0.206499	0.172045	0.259246	0.215487
0.322	0.206552	0.172342	0.259642	0.214786
0.323	0.206149	0.171987	0.260482	0.214819
0.324	0.208458	0.172166	0.261917	0.21451
0.325	0.207036	0.171606	0.260922	0.213388
0.326	0.206421	0.171859	0.260668	0.213575
0.327	0.205624	0.172079	0.261121	0.213766
0.328	0.206528	0.172263	0.25966	0.213746
0.329	0.205811	0.172494	0.258925	0.213692
0.33	0.205996	0.172313	0.258968	0.214598
0.331	0.205614	0.172487	0.258771	0.215102
0.332	0.204625	0.173314	0.25952	0.213854
0.333	0.203812	0.173719	0.258829	0.213293
0.334	0.202428	0.173524	0.259211	0.212181
0.335	0.2031	0.173337	0.258135	0.212696
0.336	0.203407	0.173577	0.257432	0.212613
0.337	0.204907	0.173737	0.258866	0.212706
0.338	0.203576	0.173586	0.258053	0.213358
0.339	0.202474	0.173131	0.260567	0.21301
0.34	0.204782	0.173642	0.259343	0.213207
0.341	0.204372	0.173658	0.256991	0.214457
0.342	0.201614	0.173073	0.258978	0.214775
0.343	0.202147	0.174043	0.260328	0.215043
0.344	0.202735	0.173243	0.258688	0.213858
0.345	0.204515	0.174107	0.26015	0.215288
0.346	0.202171	0.174082	0.259538	0.214333
0.347	0.203479	0.173945	0.261809	0.21515
0.348	0.201658	0.173958	0.260433	0.214926
0.349	0.204085	0.174611	0.260467	0.215418
0.35	0.203507	0.173928	0.260733	0.215579
0.351	0.202243	0.174402	0.259218	0.216204
0.352	0.20164	0.174477	0.260707	0.215555
0.353	0.202965	0.174608	0.259189	0.215117
0.354	0.202694	0.17489	0.259133	0.216148
0.355	0.201525	0.175421	0.261362	0.215185
0.356	0.202785	0.175432	0.259708	0.214297
0.357	0.201018	0.174699	0.260578	0.215412
0.358	0.202294	0.174914	0.260784	0.215126
0.359	0.202458	0.174876	0.258553	0.2144
0.36	0.199693	0.175265	0.259722	0.215991
0.361	0.201768	0.17483	0.258912	0.215051
0.362	0.203193	0.17538	0.260169	0.215594
0.363	0.201899	0.175207	0.259409	0.215454
0.364	0.201371	0.175304	0.259489	0.216257
0.365	0.204585	0.174915	0.260373	0.21501
0.366	0.203768	0.175345	0.260965	0.216181
0.367	0.202041	0.175128	0.259622	0.215917
0.368	0.199427	0.17496	0.260155	0.214685
0.369	0.202197	0.175623	0.258566	0.21472
0.37	0.200935	0.175456	0.259474	0.214099
0.371	0.201966	0.175321	0.258451	0.214519
0.372	0.20028	0.176337	0.259997	0.215655
0.373	0.200976	0.176389	0.260276	0.215879
0.374	0.200439	0.176661	0.258984	0.215833
0.375	0.199867	0.177107	0.259455	0.214494
0.376	0.201547	0.176576	0.25912	0.215769
0.377	0.198846	0.176468	0.259813	0.215979
0.378	0.199485	0.176281	0.260903	0.215724
0.379	0.200885	0.176022	0.260924	0.216733
0.38	0.198314	0.175889	0.261691	0.216077
0.381	0.199445	0.176707	0.261297	0.215696
0.382	0.198366	0.176877	0.26148	0.216749
0.383	0.199157	0.176004	0.261105	0.216736
0.384	0.198255	0.175593	0.262814	0.216727
0.385	0.199	0.176583	0.261193	0.217688
0.386	0.197851	0.17748	0.260552	0.217186
0.387	0.198724	0.177232	0.260461	0.217703
0.388	0.197551	0.177502	0.26116	0.218533
0.389	0.198152	0.177364	0.261702	0.218157
0.39	0.197113	0.176696	0.261177	0.219783
0.391	0.196532	0.176965	0.261938	0.218934
0.392	0.19699	0.177753	0.261697	0.220046
0.393	0.197007	0.17711	0.262839	0.220031
0.394	0.196433	0.177244	0.261964	0.220784
0.395	0.195977	0.177048	0.261514	0.218943
0.396	0.196314	0.177274	0.260908	0.221159
0.397	0.196676	0.177805	0.260799	0.222345
0.398	0.195461	0.17824	0.262662	0.220169
0.399	0.196519	0.177574	0.264256	0.222027
0.4	0.194995	0.177124	0.2624	0.222581
0.401	0.195732	0.178076	0.262074	0.223214
0.402	0.19495	0.177954	0.262154	0.221513
0.403	0.194852	0.178238	0.262052	0.222652
0.404	0.196168	0.178747	0.260713	0.223201
0.405	0.194639	0.178284	0.26173	0.223804
0.406	0.194732	0.178576	0.261621	0.224236
0.407	0.193526	0.178599	0.263077	0.223694
0.408	0.194815	0.178236	0.261286	0.224167
0.409	0.192922	0.179016	0.262039	0.223496
0.41	0.194161	0.178484	0.262827	0.223529
0.411	0.193359	0.178072	0.262738	0.223351
0.412	0.193953	0.178957	0.262492	0.222744
0.413	0.193464	0.17774	0.264596	0.222471
0.414	0.19351	0.178797	0.265072	0.224235
0.415	0.192809	0.179159	0.264075	0.223642
0.416	0.19325	0.179216	0.262199	0.223445
0.417	0.192762	0.179434	0.263206	0.224195
0.418	0.193542	0.179948	0.263069	0.223182
0.419	0.19201	0.179605	0.262562	0.223134
0.42	0.192818	0.180059	0.264007	0.225263
0.421	0.192401	0.178941	0.263915	0.224875
0.422	0.192069	0.179403	0.263362	0.225028
0.423	0.192205	0.180343	0.264074	0.224873
0.424	0.191851	0.179686	0.264233	0.223623
0.425	0.191648	0.17901	0.264081	0.224908
0.426	0.19122	0.178726	0.260635	0.223866
0.427	0.191373	0.17932	0.262562	0.22404
0.428	0.191778	0.179453	0.26554	0.224265
0.429	0.191377	0.179447	0.262487	0.224555
0.43	0.191265	0.1795	0.264006	0.2252
0.431	0.191583	0.178565	0.263955	0.225068
0.432	0.190899	0.179439	0.261202	0.22462
0.433	0.190872	0.178947	0.262283	0.224758
0.434	0.190804	0.178928	0.264125	0.224611
0.435	0.19048	0.179881	0.263192	0.22526
0.436	0.190589	0.178946	0.264263	0.225187
0.437	0.190654	0.17907	0.26339	0.225541
0.438	0.19038	0.178568	0.263555	0.225136
0.439	0.190242	0.179463	0.266927	0.224462
0.44	0.190018	0.178784	0.263266	0.224551
0.441	0.18993	0.178549	0.263578	0.22448
0.442	0.189556	0.17891	0.262918	0.22508
0.443	0.189388	0.179303	0.263022	0.225728
0.444	0.1894	0.179626	0.263563	0.224748
0.445	0.189418	0.178744	0.264744	0.225861
0.446	0.189124	0.178169	0.265638	0.22617
0.447	0.189054	0.179437	0.2634	0.226339
0.448	0.189263	0.179385	0.265857	0.22621
0.449	0.189045	0.179792	0.265792	0.226052
0.45	0.188825	0.179701	0.263925	0.226364
0.451	0.188741	0.178684	0.266326	0.226351
0.452	0.188601	0.17903	0.266173	0.225438
0.453	0.188775	0.179711	0.263871	0.225417
0.454	0.188356	0.179468	0.265224	0.225722
0.455	0.188205	0.180114	0.262678	0.225967
0.456	0.187981	0.179612	0.265595	0.226542
0.457	0.188005	0.180131	0.266622	0.225342
0.458	0.187338	0.180286	0.265806	0.225881
0.459	0.187491	0.180037	0.263889	0.226876
0.46	0.187702	0.179672	0.264333	0.22515
0.461	0.186973	0.179936	0.265566	0.225895
0.462	0.186736	0.180198	0.266013	0.227366
0.463	0.186432	0.180136	0.264665	0.225488
0.464	0.186764	0.179738	0.266172	0.226895
0.465	0.18695	0.179415	0.264325	0.226616
0.466	0.186713	0.18005	0.265539	0.226949
0.467	0.186672	0.180524	0.265079	0.226751
0.468	0.186448	0.180351	0.264189	0.226937
0.469	0.18621	0.180649	0.266506	0.226802
0.47	0.186351	0.18017	0.267307	0.226024
0.471	0.186022	0.179628	0.266713	0.22651
0.472	0.186057	0.180284	0.266809	0.228374
0.473	0.186279	0.180987	0.265358	0.227698
0.474	0.185894	0.180852	0.264952	0.226455
0.475	0.185778	0.179707	0.266478	0.227797
0.476	0.185633	0.180556	0.264776	0.227419
0.477	0.185387	0.181139	0.265313	0.226708
0.478	0.18543	0.180762	0.265468	0.227059
0.479	0.184969	0.180217	0.264982	0.227296
0.48	0.185854	0.179943	0.265461	0.228704
0.481	0.183867	0.18036	0.265126	0.228297
0.482	0.185719	0.181234	0.265026	0.228937
0.483	0.184131	0.181777	0.266013	0.227363
0.484	0.185418	0.181319	0.264363	0.22685
0.485	0.183946	0.18173	0.262771	0.228798
0.486	0.18478	0.181341	0.265591	0.228125
0.487	0.184952	0.180853	0.266456	0.227701
0.488	0.183165	0.181705	0.266269	0.227989
0.489	0.184608	0.181419	0.265541	0.228822
0.49	0.18585	0.181812	0.265969	0.228021
0.491	0.184788	0.182651	0.266386	0.228145
0.492	0.183055	0.181973	0.265808	0.229198
0.493	0.183776	0.182287	0.265653	0.228171
0.494	0.185803	0.182885	0.266322	0.227063
0.495	0.183977	0.182292	0.267149	0.227093
0.496	0.18207	0.182068	0.266189	0.227389
0.497	0.183873	0.182765	0.266226	0.225685
0.498	0.183579	0.18248	0.264652	0.226748
0.499	0.183188	0.18215	0.264367	0.227143
0.5	0.183374	0.182726	0.264506	0.225958
0.501	0.183749	0.182254	0.265571	0.225572
0.502	0.182335	0.181808	0.265213	0.227005
0.503	0.183228	0.182553	0.265263	0.225617
0.504	0.182671	0.182051	0.26517	0.22554
0.505	0.182171	0.182068	0.266661	0.226532
0.506	0.182723	0.182109	0.267333	0.225371
0.507	0.181607	0.181637	0.265929	0.225252
0.508	0.181902	0.181666	0.266212	0.226349
0.509	0.18228	0.181764	0.26614	0.224974
0.51	0.180972	0.181527	0.265851	0.224087
0.511	0.181926	0.182322	0.265007	0.225694
0.512	0.180708	0.182124	0.264856	0.225564
0.513	0.18253	0.182799	0.265898	0.224703
0.514	0.181205	0.182432	0.265755	0.225779
0.515	0.181493	0.182963	0.266291	0.225358
0.516	0.181857	0.182507	0.266501	0.22545
0.517	0.180767	0.182368	0.266096	0.223297
0.518	0.181276	0.183814	0.266379	0.22549
0.519	0.181434	0.183399	0.266575	0.224217
0.52	0.179948	0.183407	0.26545	0.223449
0.521	0.180225	0.182973	0.265949	0.224473
0.522	0.180317	0.183182	0.265076	0.224203
0.523	0.17961	0.1828	0.265417	0.223722
0.524	0.180797	0.182092	0.266276	0.223436
0.525	0.180156	0.182426	0.265309	0.224072
0.526	0.18058	0.182339	0.265381	0.223323
0.527	0.180708	0.183293	0.266518	0.224657
0.528	0.179676	0.182976	0.26617	0.224061
0.529	0.180486	0.183096	0.267148	0.225109
0.53	0.179391	0.18311	0.266781	0.224434
0.531	0.179678	0.183022	0.265526	0.224243
0.532	0.180018	0.183383	0.266772	0.225113
0.533	0.179429	0.183638	0.267327	0.224488
0.534	0.1799	0.183109	0.26536	0.225512
0.535	0.179805	0.183665	0.266091	0.224137
0.536	0.179705	0.183311	0.267463	0.224175
0.537	0.179544	0.183553	0.26794	0.223772
0.538	0.179578	0.184458	0.267333	0.223683
0.539	0.179723	0.183488	0.26704	0.224701
0.54	0.179344	0.183729	0.269225	0.223814
0.541	0.179711	0.18327	0.266356	0.223799
0.542	0.179577	0.183222	0.268029	0.224547
0.543	0.179408	0.183296	0.26491	0.224748
0.544	0.179202	0.182582	0.265603	0.224084
0.545	0.180006	0.183625	0.266501	0.22397
0.546	0.18011	0.18332	0.266037	0.224641
0.547	0.178909	0.183645	0.265844	0.224219
0.548	0.180554	0.18286	0.266245	0.225284
0.549	0.178305	0.183995	0.265244	0.224587
0.55	0.179812	0.183713	0.266392	0.22574
0.551	0.178436	0.184238	0.266479	0.224903
0.552	0.179301	0.183757	0.267037	0.225171
0.553	0.178047	0.184413	0.267377	0.224888
0.554	0.17941	0.183769	0.2675	0.225218
0.555	0.17887	0.184617	0.266488	0.224228
0.556	0.178952	0.183815	0.266304	0.224412
0.557	0.179195	0.184191	0.267148	0.22351
0.558	0.178912	0.18439	0.266577	0.22425
0.559	0.178759	0.184792	0.266858	0.223748
0.56	0.17867	0.18544	0.267137	0.224333
0.561	0.178568	0.184492	0.266336	0.223331
0.562	0.178427	0.185311	0.266438	0.223608
0.563	0.179182	0.185356	0.266364	0.223112
0.564	0.178154	0.185596	0.268966	0.223474
0.565	0.177523	0.185019	0.267329	0.223559
0.566	0.178019	0.184928	0.26679	0.223828
0.567	0.177031	0.185425	0.266858	0.223114
0.568	0.177762	0.185029	0.267128	0.222473
0.569	0.177168	0.185186	0.267295	0.223248
0.57	0.176264	0.185358	0.268534	0.222291
0.571	0.177373	0.184987	0.267821	0.222879
0.572	0.17624	0.184834	0.26912	0.223666
0.573	0.176592	0.185643	0.269206	0.222685
0.574	0.176983	0.184401	0.268844	0.223203
0.575	0.17615	0.185298	0.269394	0.223499
0.576	0.17785	0.18394	0.267351	0.222836
0.577	0.177216	0.185299	0.268513	0.22274
0.578	0.176458	0.1845	0.268256	0.22268
0.579	0.177257	0.184605	0.26974	0.223288
0.58	0.175813	0.184998	0.267912	0.224032
0.581	0.176039	0.184749	0.267869	0.224443
0.582	0.177246	0.185577	0.268184	0.223656
0.583	0.176828	0.185148	0.267244	0.222592
0.584	0.175291	0.185833	0.267019	0.222864
0.585	0.17682	0.185193	0.268671	0.223965
0.586	0.176088	0.185436	0.26843	0.222819
0.587	0.176612	0.184402	0.26902	0.222273
0.588	0.176587	0.184499	0.268889	0.223926
0.589	0.175506	0.184576	0.268049	0.222566
0.59	0.176407	0.18457	0.268435	0.222321
0.591	0.175533	0.185437	0.268932	0.223873
0.592	0.175676	0.185219	0.270565	0.224286
0.593	0.175996	0.184948	0.267284	0.222705
0.594	0.175473	0.185737	0.269218	0.221695
0.595	0.176508	0.186075	0.269678	0.222577
0.596	0.176172	0.185883	0.267241	0.223862
0.597	0.176226	0.186738	0.269594	0.223317
0.598	0.176902	0.186399	0.271787	0.222434
0.599	0.175541	0.186927	0.268621	0.223172
0.6	0.176108	0.187599	0.271256	0.223793
0.601	0.175878	0.187064	0.271211	0.223868
0.602	0.177812	0.187323	0.268329	0.222529
0.603	0.175414	0.187465	0.270363	0.222889
0.604	0.175021	0.187007	0.271977	0.221345
0.605	0.177058	0.187222	0.269418	0.222043
0.606	0.177272	0.187404	0.270532	0.221899
0.607	0.177001	0.188209	0.270674	0.222085
0.608	0.174797	0.187873	0.271035	0.220724
0.609	0.175734	0.187147	0.270085	0.220766
0.61	0.174517	0.187503	0.269952	0.221211
0.611	0.176186	0.188165	0.268868	0.222357
0.612	0.176071	0.187063	0.269397	0.222468
0.613	0.176651	0.187373	0.269019	0.222907
0.614	0.173873	0.186859	0.269717	0.220907
0.615	0.17422	0.186827	0.267901	0.221323
0.616	0.174453	0.187124	0.26906	0.221391
0.617	0.175059	0.186068	0.268743	0.222786
0.618	0.176469	0.186748	0.269255	0.221367
0.619	0.177358	0.187615	0.267072	0.221784
0.62	0.17531	0.187245	0.269897	0.220439
0.621	0.17431	0.186858	0.268125	0.220717
0.622	0.176542	0.187153	0.269238	0.220486
0.623	0.175487	0.188593	0.268053	0.220519
0.624	0.174501	0.188304	0.270579	0.220694
0.625	0.176004	0.187091	0.268219	0.220787
0.626	0.175825	0.188453	0.268984	0.221083
0.627	0.174127	0.188582	0.270827	0.219878
0.628	0.176187	0.189044	0.269269	0.220226
0.629	0.174691	0.188569	0.271484	0.22074
0.63	0.175687	0.187754	0.269154	0.220279
0.631	0.173931	0.188641	0.271889	0.219836
0.632	0.175553	0.188223	0.268637	0.221386
0.633	0.176214	0.187518	0.27052	0.221418
0.634	0.17567	0.188582	0.268152	0.220706
0.635	0.175254	0.18854	0.269701	0.220385
0.636	0.175119	0.187882	0.270171	0.221067
0.637	0.176779	0.188448	0.270701	0.222343
0.638	0.17323	0.188698	0.272289	0.220898
0.639	0.175148	0.187855	0.271285	0.220561
0.64	0.175918	0.187978	0.271703	0.219761
0.641	0.17654	0.188491	0.270819	0.219358
0.642	0.173784	0.18777	0.272154	0.219048
0.643	0.174533	0.188108	0.270758	0.218939
0.644	0.175169	0.188456	0.269724	0.218589
0.645	0.175834	0.189805	0.271485	0.217749
0.646	0.175334	0.190024	0.273601	0.218249
0.647	0.174355	0.189448	0.273477	0.218679
0.648	0.174055	0.189565	0.271735	0.218486
0.649	0.174841	0.188895	0.269971	0.218383
0.65	0.174074	0.187633	0.270857	0.218614
0.651	0.174011	0.187997	0.271612	0.217837
0.652	0.173589	0.188637	0.272459	0.217486
0.653	0.173992	0.188313	0.272392	0.217607
0.654	0.17716	0.188435	0.272018	0.217151
0.655	0.17547	0.189044	0.271535	0.21719
0.656	0.174359	0.188833	0.270721	0.21708
0.657	0.173434	0.18853	0.270509	0.217212
0.658	0.174333	0.187862	0.270166	0.217438
0.659	0.173881	0.188936	0.269421	0.218603
0.66	0.173344	0.188536	0.271761	0.217152
0.661	0.173424	0.188538	0.270474	0.216326
0.662	0.175371	0.189134	0.270916	0.216121
0.663	0.173963	0.189453	0.27087	0.216939
0.664	0.175432	0.190334	0.272083	0.217181
0.665	0.174739	0.189856	0.269444	0.217242
0.666	0.173863	0.189609	0.269819	0.217518
0.667	0.174897	0.189153	0.271841	0.21713
0.668	0.174774	0.188701	0.270792	0.216659
0.669	0.174239	0.18876	0.271908	0.217821
0.67	0.175731	0.189229	0.273009	0.217141
0.671	0.17398	0.188999	0.270771	0.21773
0.672	0.175391	0.188752	0.270413	0.218488
0.673	0.174418	0.188526	0.270838	0.218436
0.674	0.174326	0.18947	0.270562	0.218781
0.675	0.174486	0.189691	0.271142	0.217431
0.676	0.173831	0.190365	0.271129	0.218286
0.677	0.174583	0.189313	0.27077	0.218346
0.678	0.173805	0.189122	0.270189	0.2173
0.679	0.174926	0.189384	0.270852	0.216642
0.68	0.174179	0.19014	0.270301	0.217226
0.681	0.175528	0.190205	0.270965	0.217761
0.682	0.17466	0.189187	0.270432	0.218528
0.683	0.173023	0.188632	0.270315	0.217529
0.684	0.173108	0.189396	0.269841	0.216999
0.685	0.175405	0.190257	0.269688	0.216674
0.686	0.173885	0.190541	0.270289	0.217486
0.687	0.172184	0.19031	0.270985	0.217973
0.688	0.172034	0.189934	0.270687	0.217215
0.689	0.173003	0.190685	0.269901	0.21643
0.69	0.17177	0.190471	0.270003	0.217522
0.691	0.173175	0.190617	0.270031	0.216958
0.692	0.172478	0.190197	0.270361	0.217768
0.693	0.173861	0.189334	0.271216	0.218165
0.694	0.172772	0.189759	0.270653	0.217335
0.695	0.17334	0.190592	0.271111	0.21807
0.696	0.173746	0.190531	0.270855	0.218395
0.697	0.173289	0.191507	0.271033	0.218014
0.698	0.173379	0.1907	0.271481	0.217276
0.699	0.173218	0.190246	0.270225	0.217194
0.7	0.172863	0.190682	0.271131	0.21722
0.701	0.172465	0.191322	0.271483	0.216219
0.702	0.172929	0.191254	0.270601	0.216732
0.703	0.173037	0.190587	0.27108	0.216542
0.704	0.172791	0.190328	0.272287	0.217277
0.705	0.172803	0.190402	0.271817	0.216115
0.706	0.172585	0.190718	0.272999	0.216371
0.707	0.172981	0.190623	0.272317	0.216732
0.708	0.172393	0.190371	0.274519	0.21635
0.709	0.17345	0.191524	0.272094	0.215506
0.71	0.172846	0.192534	0.271277	0.217055
0.711	0.172935	0.191985	0.27141	0.215674
0.712	0.172622	0.191823	0.269703	0.215964
0.713	0.172857	0.191561	0.271025	0.215913
0.714	0.172859	0.192707	0.272508	0.215499
0.715	0.173	0.192334	0.272608	0.215615
0.716	0.172687	0.191939	0.270751	0.217037
0.717	0.172873	0.191559	0.272049	0.216648
0.718	0.173123	0.192075	0.273614	0.216619
0.719	0.172948	0.192179	0.272587	0.215092
0.72	0.173182	0.192028	0.273377	0.215572
0.721	0.173231	0.192768	0.272933	0.216853
0.722	0.173362	0.192652	0.272933	0.216672
0.723	0.173046	0.192223	0.272045	0.215828
0.724	0.172978	0.193121	0.272427	0.216149
0.725	0.173404	0.193386	0.272497	0.215371
0.726	0.173262	0.193696	0.273194	0.216628
0.727	0.173754	0.192525	0.272641	0.216643
0.728	0.173461	0.193335	0.27262	0.215531
0.729	0.173246	0.193513	0.272188	0.214736
0.73	0.173485	0.193744	0.271195	0.216234
0.731	0.173236	0.194021	0.272816	0.215448
0.732	0.173106	0.192983	0.272195	0.216219
0.733	0.173367	0.193213	0.272767	0.215697
0.734	0.172589	0.193448	0.272586	0.215786
0.735	0.174408	0.193585	0.273071	0.217092
0.736	0.17232	0.19391	0.273077	0.215618
0.737	0.173022	0.194785	0.272908	0.215059
0.738	0.172458	0.194453	0.273743	0.216287
0.739	0.172283	0.194216	0.273046	0.214799
0.74	0.173259	0.193667	0.273047	0.215522
0.741	0.173391	0.19298	0.272899	0.21482
0.742	0.172317	0.193131	0.27298	0.215173
0.743	0.17273	0.193688	0.272885	0.215746
0.744	0.173862	0.193199	0.273211	0.214867
0.745	0.17311	0.193437	0.272983	0.215275
0.746	0.173211	0.192559	0.272478	0.215338
0.747	0.172536	0.192665	0.272436	0.215113
0.748	0.174086	0.192852	0.272058	0.214058
0.749	0.173263	0.19251	0.272234	0.214509
0.75	0.172464	0.193125	0.272803	0.214645
0.751	0.173348	0.192409	0.272835	0.215105
0.752	0.172524	0.192842	0.27302	0.215202
0.753	0.172775	0.193734	0.27204	0.215281
0.754	0.173077	0.19286	0.273623	0.215419
0.755	0.172819	0.19268	0.274257	0.215848
0.756	0.172717	0.191633	0.27428	0.216178
0.757	0.17326	0.192866	0.273679	0.214823
0.758	0.173331	0.19342	0.273807	0.215913
0.759	0.174119	0.193135	0.272926	0.214997
0.76	0.173493	0.192918	0.272057	0.215535
0.761	0.174422	0.193968	0.270877	0.215272
0.762	0.173878	0.193327	0.270646	0.214513
0.763	0.174573	0.193734	0.27131	0.215228
0.764	0.174047	0.193329	0.271591	0.21564
0.765	0.173996	0.193343	0.271377	0.213808
0.766	0.174409	0.193495	0.270867	0.214209
0.767	0.173887	0.193643	0.271706	0.215566
0.768	0.174361	0.193534	0.27255	0.214513
0.769	0.172741	0.193732	0.272587	0.214827
0.77	0.173069	0.193864	0.272042	0.214966
0.771	0.17451	0.193849	0.272944	0.213631
0.772	0.172927	0.193365	0.272324	0.214338
0.773	0.173458	0.194267	0.274115	0.213072
0.774	0.174094	0.194154	0.274016	0.213072
0.775	0.172908	0.194502	0.273721	0.214475
0.776	0.174381	0.193799	0.273494	0.213119
0.777	0.17337	0.193531	0.272837	0.212928
0.778	0.173355	0.194711	0.273593	0.214322
0.779	0.174151	0.194154	0.273028	0.213926
0.78	0.172989	0.194768	0.271661	0.213754
0.781	0.172625	0.19455	0.272524	0.214394
0.782	0.173075	0.195028	0.27397	0.214379
0.783	0.172216	0.194325	0.273128	0.213855
0.784	0.173319	0.195084	0.271684	0.212851
0.785	0.172324	0.194772	0.271314	0.212967
0.786	0.173081	0.194853	0.272045	0.212839
0.787	0.172386	0.194519	0.273287	0.212876
0.788	0.172874	0.195312	0.272618	0.21306
0.789	0.17263	0.195008	0.27328	0.214133
0.79	0.172855	0.194465	0.272603	0.213494
0.791	0.17287	0.194618	0.271541	0.213941
0.792	0.173438	0.194436	0.273613	0.212731
0.793	0.173422	0.195203	0.275119	0.213227
0.794	0.173382	0.194831	0.273203	0.212913
0.795	0.172737	0.194458	0.271728	0.213262
0.796	0.173606	0.194298	0.274143	0.214945
0.797	0.172646	0.19456	0.276311	0.214465
0.798	0.173217	0.194209	0.273533	0.213862
0.799	0.172897	0.194621	0.274041	0.21506
0.8	0.172548	0.194245	0.274795	0.213445
0.801	0.172834	0.194716	0.272443	0.213315
0.802	0.172086	0.195088	0.273517	0.213977
0.803	0.172573	0.194131	0.273866	0.21425
0.804	0.172682	0.194939	0.274007	0.21378
0.805	0.172406	0.194867	0.27269	0.214565
0.806	0.172842	0.19429	0.27335	0.213578
0.807	0.172566	0.194106	0.274613	0.213128
0.808	0.172642	0.194703	0.27536	0.213228
0.809	0.172861	0.195389	0.275199	0.21391
0.81	0.173059	0.195452	0.274861	0.213695
0.811	0.17301	0.19473	0.274671	0.212149
0.812	0.173502	0.194949	0.274406	0.212406
0.813	0.17318	0.195481	0.274333	0.211834
0.814	0.173138	0.19482	0.274582	0.213759
0.815	0.173059	0.194881	0.274438	0.214286
0.816	0.17285	0.195366	0.275578	0.213202
0.817	0.172784	0.195487	0.275168	0.213207
0.818	0.17294	0.195381	0.275274	0.213754
0.819	0.173408	0.195674	0.27589	0.212897
0.82	0.173958	0.195634	0.274699	0.214189
0.821	0.173618	0.195781	0.275243	0.213753
0.822	0.173494	0.195715	0.274249	0.212588
0.823	0.173286	0.195699	0.275579	0.212861
0.824	0.173107	0.194824	0.274486	0.212366
0.825	0.173286	0.195091	0.274684	0.213594
0.826	0.173401	0.195084	0.274267	0.213335
0.827	0.171874	0.19495	0.275218	0.212582
0.828	0.17245	0.194923	0.275353	0.213817
0.829	0.172184	0.195201	0.274633	0.213465
0.83	0.172344	0.195126	0.275405	0.212406
0.831	0.172569	0.195482	0.275847	0.213133
0.832	0.17273	0.195321	0.276402	0.212925
0.833	0.171688	0.195047	0.276115	0.21189
0.834	0.172167	0.19461	0.275589	0.212861
0.835	0.172104	0.194846	0.27507	0.212572
0.836	0.172439	0.195161	0.275701	0.212278
0.837	0.172566	0.1952	0.275808	0.212718
0.838	0.171863	0.194482	0.275562	0.212102
0.839	0.173881	0.194018	0.275423	0.213264
0.84	0.172295	0.194136	0.275105	0.213101
0.841	0.171967	0.194628	0.274731	0.212876
0.842	0.171419	0.194981	0.274185	0.212
0.843	0.172564	0.194324	0.274977	0.212663
0.844	0.173296	0.19451	0.275788	0.212961
0.845	0.171945	0.195186	0.27566	0.212165
0.846	0.171968	0.195496	0.274878	0.212171
0.847	0.173103	0.194946	0.275477	0.213143
0.848	0.172676	0.194758	0.275107	0.212842
0.849	0.172906	0.194668	0.275461	0.212603
0.85	0.173501	0.194373	0.276047	0.212108
0.851	0.173943	0.195105	0.275155	0.212748
0.852	0.173093	0.195861	0.274902	0.212062
0.853	0.172946	0.195775	0.275614	0.212287
0.854	0.174245	0.195888	0.276167	0.21324
0.855	0.173344	0.195623	0.275479	0.212469
0.856	0.172618	0.195185	0.276135	0.211686
0.857	0.174718	0.194602	0.275418	0.212511
0.858	0.173141	0.1944	0.275528	0.212321
0.859	0.172976	0.194921	0.275573	0.213204
0.86	0.173835	0.19535	0.274729	0.211656
0.861	0.173317	0.194973	0.274045	0.212085
0.862	0.172924	0.194926	0.275849	0.211183
0.863	0.172981	0.195269	0.277383	0.21207
0.864	0.172397	0.195164	0.276928	0.212672
0.865	0.175083	0.19567	0.275828	0.212685
0.866	0.175113	0.195402	0.275333	0.211838
0.867	0.172897	0.195248	0.274953	0.212582
0.868	0.172813	0.195163	0.274684	0.212617
0.869	0.172952	0.195438	0.274795	0.212874
0.87	0.174123	0.1954	0.275256	0.213009
0.871	0.172509	0.195244	0.275848	0.213511
0.872	0.173447	0.195704	0.275924	0.213012
0.873	0.172964	0.196967	0.275825	0.212688
0.874	0.173935	0.196286	0.276063	0.213261
0.875	0.175687	0.195996	0.27605	0.213391
0.876	0.173251	0.195658	0.276719	0.214353
0.877	0.173085	0.195039	0.275834	0.214056
0.878	0.17274	0.195617	0.275211	0.213668
0.879	0.172989	0.195603	0.275723	0.213899
0.88	0.174097	0.19532	0.276496	0.21389
0.881	0.173455	0.19564	0.27736	0.212976
0.882	0.173428	0.196114	0.276788	0.211737
0.883	0.173547	0.196269	0.275817	0.21263
0.884	0.17237	0.195917	0.275831	0.212866
0.885	0.173003	0.195698	0.275616	0.21279
0.886	0.172051	0.195784	0.276075	0.213953
0.887	0.174696	0.19555	0.275968	0.212737
0.888	0.174056	0.196117	0.275764	0.211637
0.889	0.172013	0.195239	0.276137	0.212641
0.89	0.173215	0.195041	0.27646	0.212554
0.891	0.17331	0.195357	0.27527	0.212125
0.892	0.1748	0.195704	0.275311	0.212914
0.893	0.174383	0.196116	0.27648	0.213521
0.894	0.173859	0.195307	0.27662	0.212844
0.895	0.172441	0.195278	0.276444	0.212398
0.896	0.172923	0.19597	0.275668	0.212595
0.897	0.172184	0.196649	0.27516	0.213642
0.898	0.172298	0.196845	0.275694	0.213465
0.899	0.173218	0.19637	0.275776	0.212147
0.9	0.173538	0.196768	0.275384	0.212601
0.901	0.172186	0.197015	0.275605	0.213573
0.902	0.171621	0.196246	0.27539	0.21216
0.903	0.171195	0.196934	0.276223	0.213219
0.904	0.171999	0.19674	0.275472	0.213115
0.905	0.173008	0.197632	0.275874	0.213104
0.906	0.172616	0.197063	0.275883	0.211979
0.907	0.172106	0.197242	0.275227	0.212118
0.908	0.17157	0.197061	0.276124	0.212848
0.909	0.171847	0.196747	0.275564	0.212954
0.91	0.171438	0.197163	0.275335	0.211935
0.911	0.172675	0.196087	0.275539	0.211387
0.912	0.172174	0.196897	0.276234	0.211531
0.913	0.172265	0.197457	0.276613	0.211734
0.914	0.172518	0.196879	0.27606	0.211292
0.915	0.171515	0.196443	0.275315	0.212369
0.916	0.172998	0.196766	0.275424	0.212437
0.917	0.171687	0.197409	0.276077	0.211077
0.918	0.170823	0.197077	0.276105	0.211736
0.919	0.171978	0.198245	0.275667	0.211759
0.92	0.172169	0.196894	0.276551	0.21247
0.921	0.172536	0.195671	0.274878	0.211743
0.922	0.171172	0.196062	0.278052	0.211625
0.923	0.171904	0.195896	0.276767	0.211598
0.924	0.172046	0.19708	0.276798	0.211537
0.925	0.171674	0.196131	0.276789	0.212
0.926	0.17222	0.19625	0.275077	0.212713
0.927	0.170807	0.196166	0.277464	0.211702
0.928	0.17157	0.196931	0.275091	0.212143
0.929	0.172622	0.196531	0.277258	0.211245
0.93	0.172682	0.196726	0.274763	0.211931
0.931	0.171605	0.19585	0.275869	0.212765
0.932	0.171173	0.195808	0.276085	0.213318
0.933	0.171459	0.196549	0.275987	0.213331
0.934	0.171608	0.197386	0.275682	0.21291
0.935	0.171498	0.197273	0.27572	0.212798
0.936	0.171589	0.196366	0.276071	0.212406
0.937	0.171394	0.195526	0.276917	0.212626
0.938	0.171537	0.19573	0.276327	0.211624
0.939	0.17307	0.197506	0.276774	0.210954
0.94	0.173187	0.19677	0.277283	0.211317
0.941	0.171744	0.197344	0.275724	0.211034
0.942	0.171534	0.197095	0.274663	0.211453
0.943	0.17099	0.1976	0.2773	0.211814
0.944	0.170807	0.196556	0.275398	0.212396
0.945	0.172356	0.196618	0.27754	0.211374
0.946	0.1709	0.197262	0.277593	0.211786
0.947	0.170829	0.198432	0.274927	0.213303
0.948	0.1706	0.198257	0.27764	0.212874
0.949	0.170881	0.197206	0.276854	0.212124
0.95	0.172048	0.197511	0.275911	0.213678
0.951	0.171437	0.197881	0.278456	0.212409
0.952	0.172332	0.198688	0.275649	0.212082
0.953	0.171725	0.199151	0.277351	0.213347
0.954	0.170987	0.198335	0.276697	0.212387
0.955	0.170839	0.197514	0.277461	0.212313
0.956	0.171058	0.198158	0.277001	0.213871
0.957	0.172223	0.198972	0.277737	0.213137
0.958	0.17303	0.198613	0.278695	0.213901
0.959	0.170838	0.197668	0.277951	0.212849
0.96	0.170746	0.197701	0.277198	0.213311
0.961	0.17194	0.197403	0.278231	0.213298
0.962	0.171592	0.198135	0.27705	0.213437
0.963	0.170997	0.198108	0.277773	0.213205
0.964	0.170626	0.197817	0.278509	0.213447
0.965	0.172385	0.197732	0.278431	0.212567
0.966	0.170732	0.197457	0.278106	0.215164
0.967	0.170086	0.197401	0.278642	0.214809
0.968	0.171801	0.197047	0.280783	0.212705
0.969	0.170021	0.196918	0.279763	0.212572
0.97	0.170819	0.197835	0.277542	0.211959
0.971	0.170834	0.198424	0.279216	0.212985
0.972	0.170055	0.197806	0.281671	0.212701
0.973	0.171446	0.197195	0.279085	0.212106
0.974	0.170159	0.197275	0.277589	0.213343
0.975	0.17117	0.198541	0.27871	0.212574
0.976	0.170476	0.197638	0.27956	0.212813
0.977	0.171389	0.198485	0.27724	0.213292
0.978	0.170968	0.197913	0.276076	0.212411
0.979	0.169872	0.19647	0.278128	0.213408
0.98	0.170824	0.197339	0.278744	0.212856
0.981	0.171609	0.197627	0.280771	0.211972
0.982	0.171326	0.197656	0.27876	0.213283
0.983	0.170467	0.197472	0.277738	0.213071
0.984	0.171922	0.197634	0.278595	0.212356
0.985	0.173505	0.197399	0.280885	0.213433
0.986	0.172738	0.197539	0.279422	0.212705
0.987	0.172103	0.19792	0.278695	0.213283
0.988	0.172629	0.197148	0.281286	0.213671
0.989	0.172216	0.196854	0.280007	0.213187
0.99	0.171545	0.197699	0.279386	0.213062
0.991	0.17268	0.198255	0.279425	0.214113
0.992	0.172137	0.198602	0.279509	0.214151
0.993	0.171424	0.198661	0.280246	0.213393
0.994	0.171057	0.198311	0.279379	0.213631
0.995	0.171521	0.198478	0.278553	0.214451
0.996	0.170962	0.198992	0.279515	0.213715
0.997	0.170851	0.199057	0.278226	0.214549
0.998	0.171561	0.198575	0.280363	0.215039
0.999	0.171135	0.199406	0.281002	0.215347
1	0.170069	0.186054	0.244982	0.192918
