# Supplementary material for: The roles of contact conformity, temperature and displacement amplitude on the lubricated fretting wear of a steel-on-steel contact
Source: R Soc Open Sci. 2016 Oct 19;3(10):150637. doi: 10.1098/rsos.150637 (PMC5095370; doi:10.1098/rsos.150637)
Supplement: Fig-22b [file rsos150637supp12.xlsx]

## Sheet: Fig-26 right
Figure 26b
300 µm
Temperature / ˚C	Wear rate / 10^(-5) mm^3 N^(-1) m^(-1)	V- / mm^3	Sliding Amp / microns
25.6	0.123412	0.0368326	298.451
85	0.249401	0.0744066	298.341
150	0.388173	0.115785	298.281
230	0.134084	0.0400142	298.426
100 µm
Temperature / ˚C	Wear rate / 10^(-5) mm^3 N^(-1) m^(-1)	V- / mm^3	Sliding Amp / microns
22	0.362108	0.0355279	98.1139
85	0.552877	0.0541408	97.9254
150	0.325079	0.0320229	98.5081
230	0.156402	0.0154337	98.6795
25 µm
Temperature / ˚C	Wear rate / 10^(-5) mm^3 N^(-1) m^(-1)	V- / mm^3	Sliding Amp / microns
22	1.45221	0.0243449	16.764
85	0.567549	0.0120743	21.2745
150	0.391554	0.00899389	22.9697
230	0.322532	0.0074381	23.0616
